# Supplementary material for: High-yield preparation of [2]rotaxanes based on the bis(m-phenylene)-32-crown-10-based cryptand/paraquat derivative recognition motif
Source: Royal Society of Chemistry journal article supplement (doi:10.1039/b803927e), 2008-01-01
Supplement: b803927e.pdf [file b803927e.pdf]

# **High-yield preparation of [2]rotaxanes based on the bis(*m*-phenylene)-32-crown-10-based cryptand/paraquat derivative recognition motif**

Shijun Li,<sup>a</sup> Ming Liu,<sup>a</sup> Jinqiang Zhang,<sup>a</sup> Bo Zheng,<sup>a</sup> Chuanju Zhang,<sup>a</sup>  
Xianhong Wen,<sup>b</sup> Ning Li,<sup>a</sup> and Feihe Huang\*<sup>a</sup>

<sup>a</sup> *Department of Chemistry, Zhejiang University, Hangzhou 310027, P. R. China.*

*Tel and Fax: 86 571 8795 3189; E-mail: fhuang@zju.edu.cn*

<sup>b</sup> *Department of Chemistry, Zhejiang Forest University, Hangzhou 311300, P. R. China*

**Electronic Supplementary Information (5 pages)**

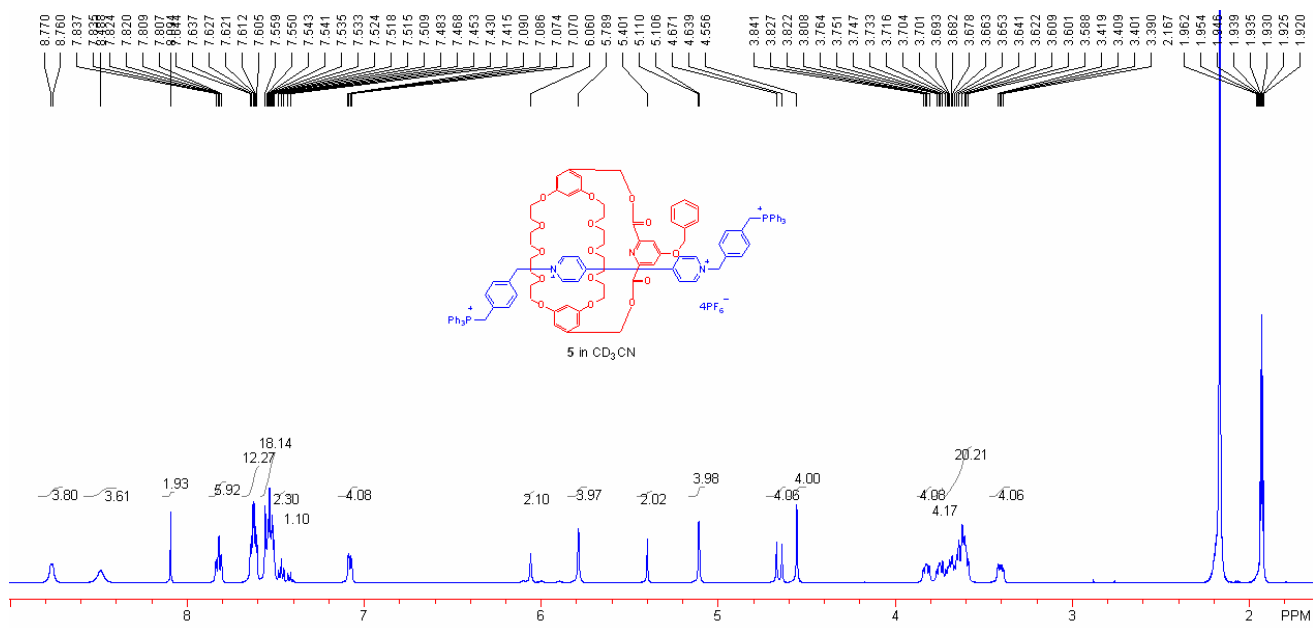

**Fig. S1.**  $^1\text{H}$  NMR of **5** (500 MHz,  $\text{CD}_3\text{CN}$ , 22 °C).

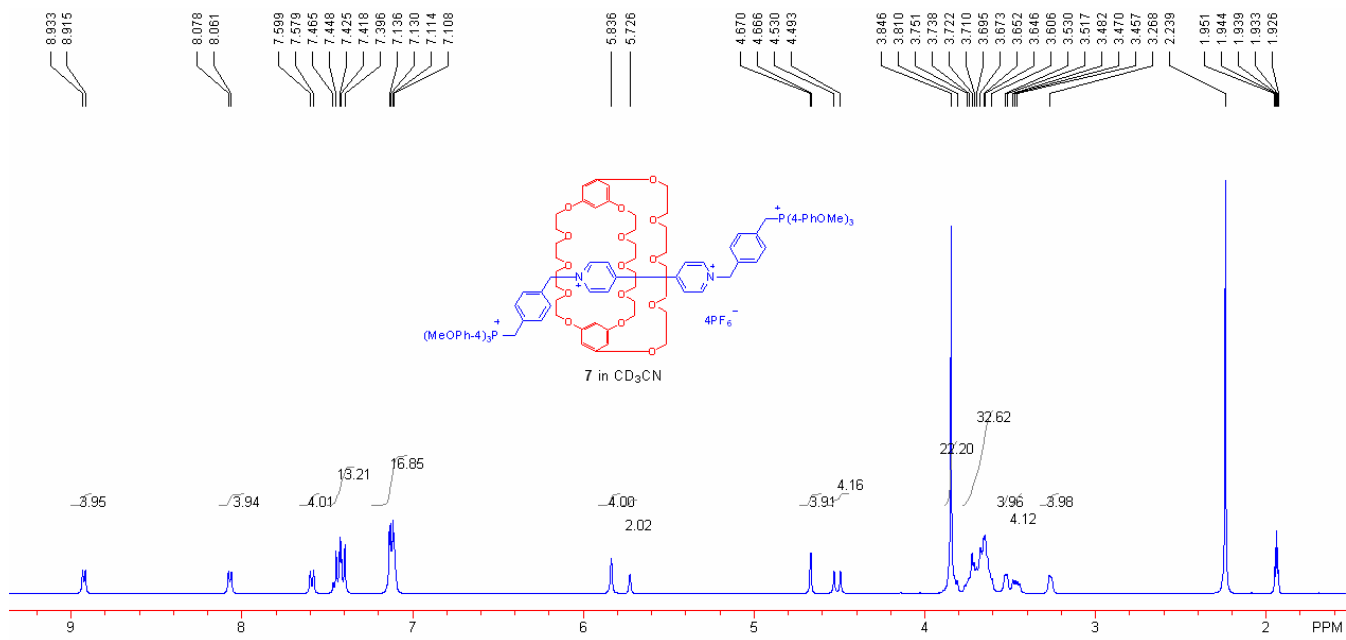

**Fig. S2.**  $^1\text{H}$  NMR of **7** (400 MHz,  $\text{CD}_3\text{CN}$ , 22 °C).

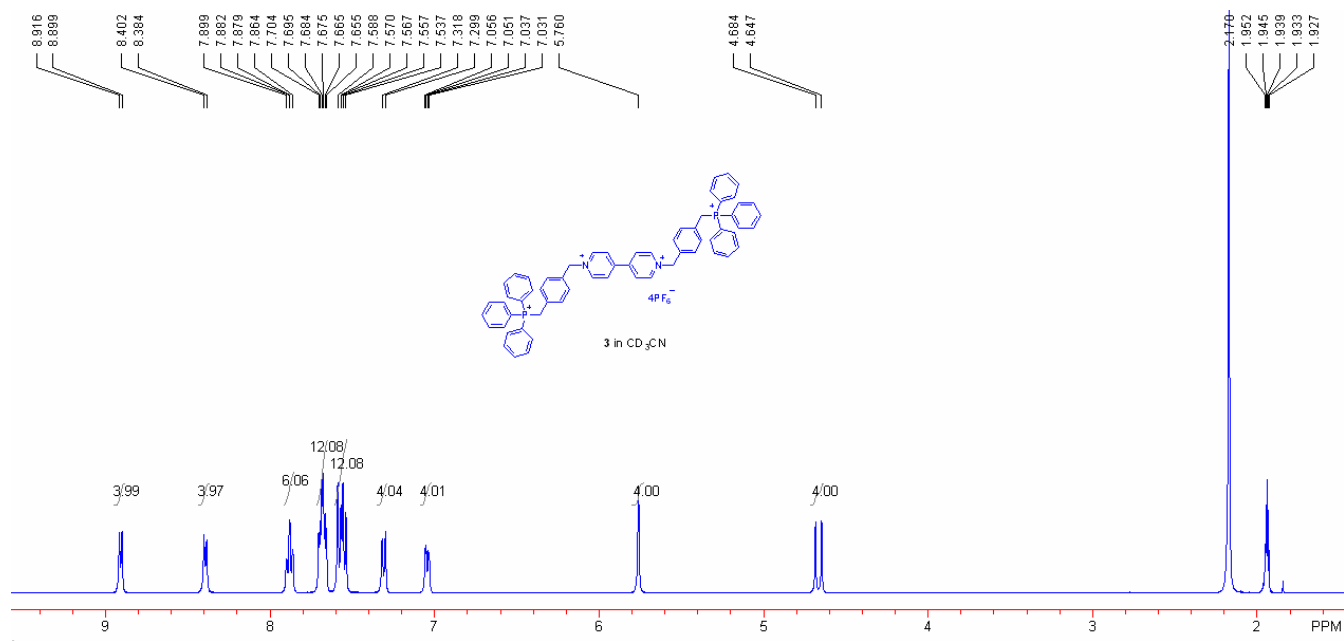

Fig. S3.  $^1\text{H}$  NMR of **3** (400 MHz,  $\text{CD}_3\text{CN}$ , 22 °C).

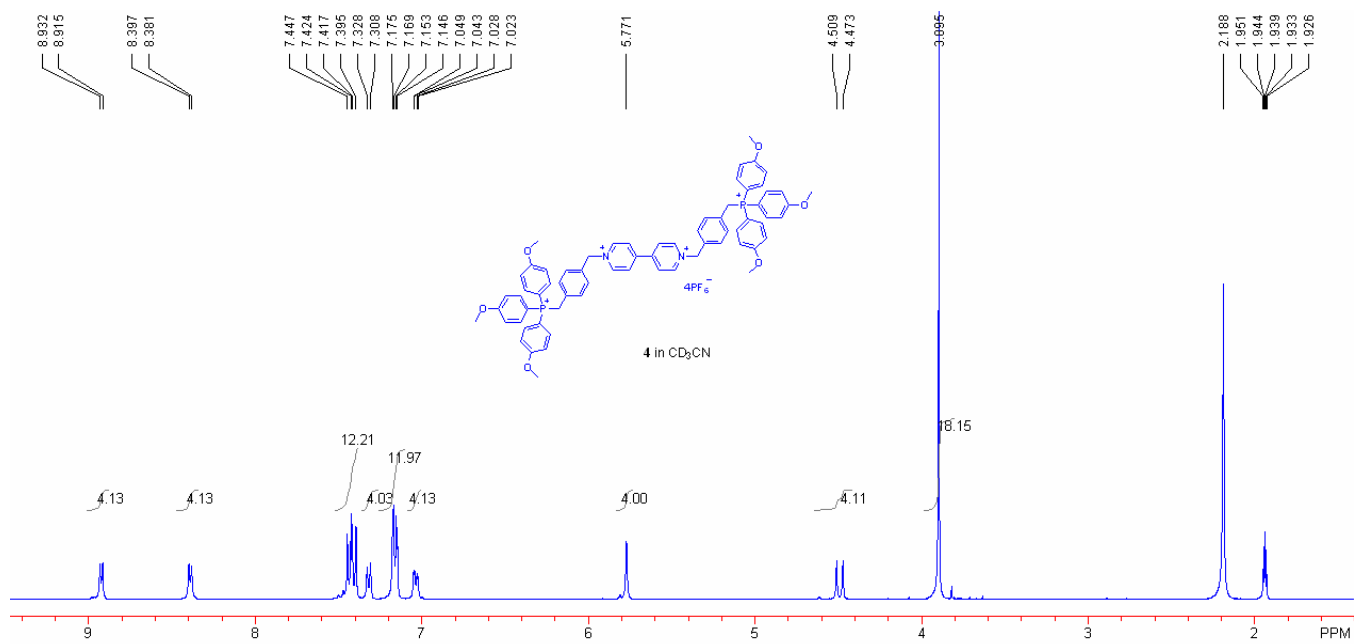

Fig. S4.  $^1\text{H}$  NMR of **4** (400 MHz,  $\text{CD}_3\text{CN}$ , 22 °C).

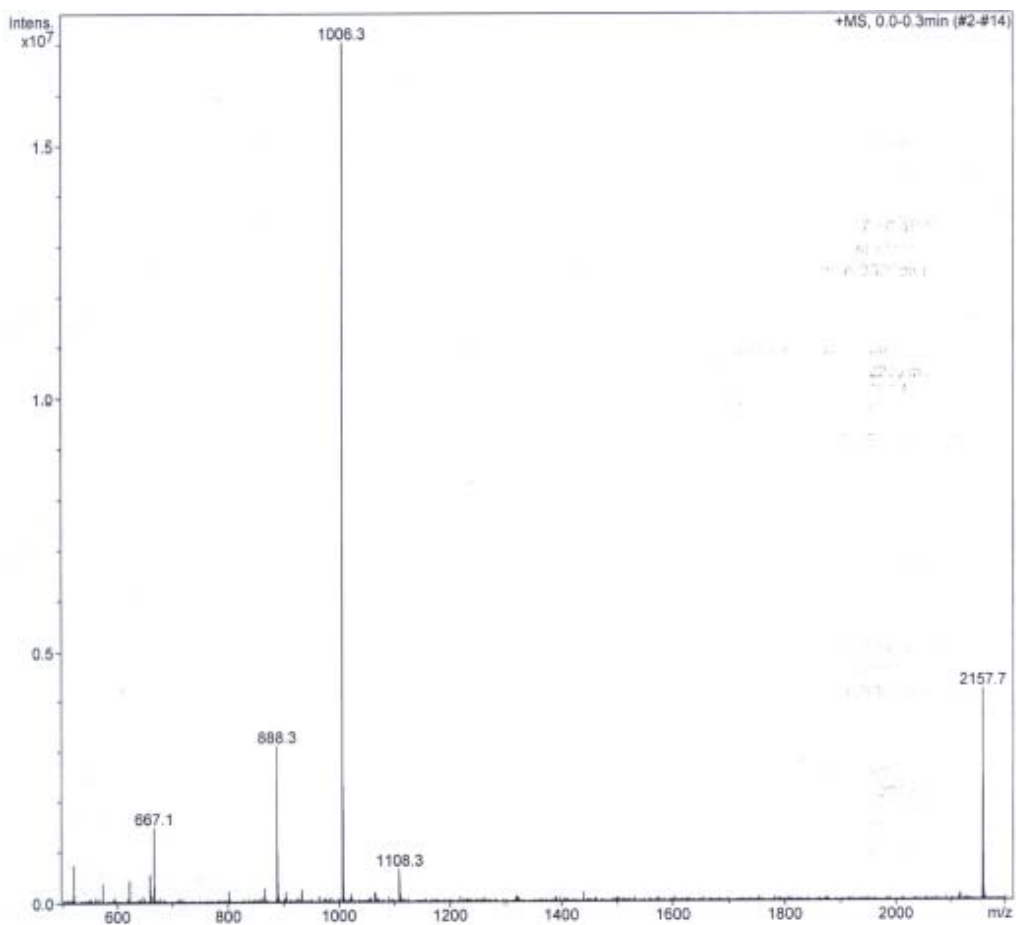

**Fig. S5.** Electrospray ionization mass spectrum (ESI) of [2]rotaxane **5** in acetonitrile/methanol. Assignment of main peaks:  $m/z$  2157.7 (30%)  $[\mathbf{5} - \text{PF}_6 + \text{H}]^+$ , 1006.3 (100%)  $[\mathbf{5} - 2\text{PF}_6]^{2+}$ .

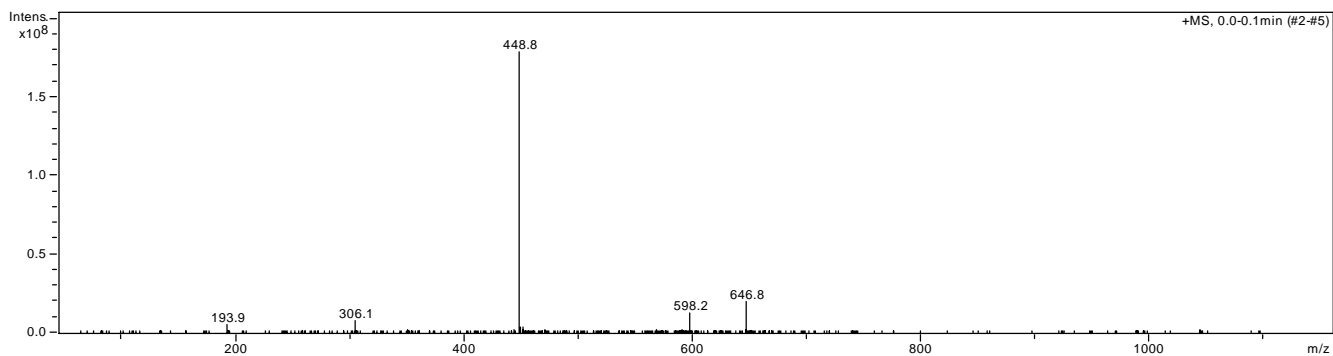

**Fig. S6.** Electrospray ionization mass spectrum (ESI) of [2]rotaxane **7** in acetonitrile/methanol. Assignment of main peaks:  $m/z = 646.8$  (11%)  $[\mathbf{7} - 3\text{PF}_6]^{3+}$ ,  $598.2$  (7%)  $[\mathbf{7} - 3\text{PF}_6 - \text{HPF}_6]^{3+}$ ,  $448.8$  (100%)  $[\mathbf{7} - 4\text{PF}_6]^{4+}$ .

Isj103

LSJ-103 107 (1.987) Sb (1,40.00); Sm (SG, 2x3.00); Cm (90:115)

1: TOF MS ES+  
4.45e4

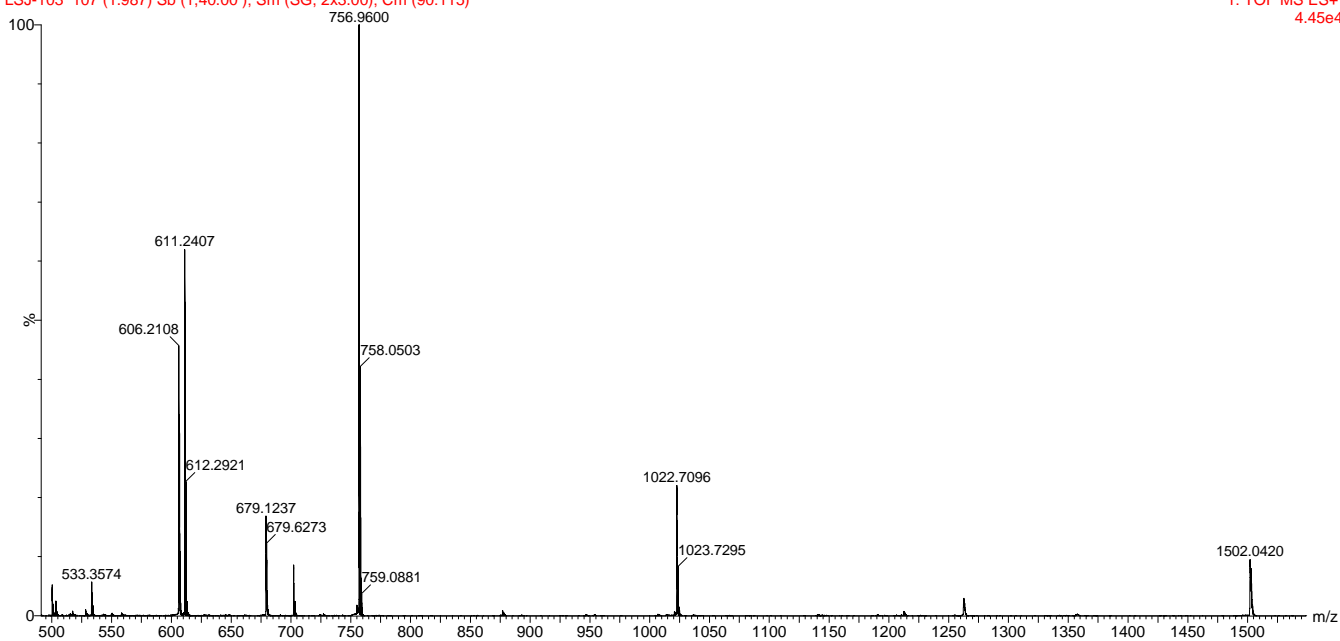

**Fig. S7.** Electrospray ionization mass spectrum (ESI) of dumbbell-shaped compound **4** in acetonitrile/methanol. Assignment of main peaks:  $m/z$  1502.0 (25%) [**4** - HPF<sub>6</sub>]<sup>+</sup>, 1022.7 (43%) [**4** - 2PF<sub>6</sub> - 2HPF<sub>6</sub> - 2OCH<sub>3</sub> + H<sub>2</sub>O]<sup>+</sup>, 757.0 (100%) [**4** - 3PF<sub>6</sub> - (4-MeOPh)<sub>3</sub>PCH<sub>2</sub>PhCH<sub>2</sub>]<sup>+</sup>, 679.1 (28%) [**4** - 2PF<sub>6</sub>]<sup>2+</sup>, 611.2 (76%) [**4** - 3PF<sub>6</sub> - HPF<sub>6</sub> - (4-MeOPh)<sub>3</sub>PCH<sub>2</sub>PhCH<sub>2</sub>]<sup>+</sup>, 606.2 (62%) [**4** - HPF<sub>6</sub> - 2PF<sub>6</sub>]<sup>2+</sup>, 533.4 (9%) [**4** - 2HPF<sub>6</sub> - 2PF<sub>6</sub>]<sup>2+</sup>.
